# Supplementary material for: A 35-gene signature discriminates between rapidly- and slowly-progressing glioblastoma multiforme and predicts survival in known subtypes of the cancer
Source: PubMed Central journal article supplement (PMC5883543; doi:10.1186/s12885-018-4103-5), 2018-04-03

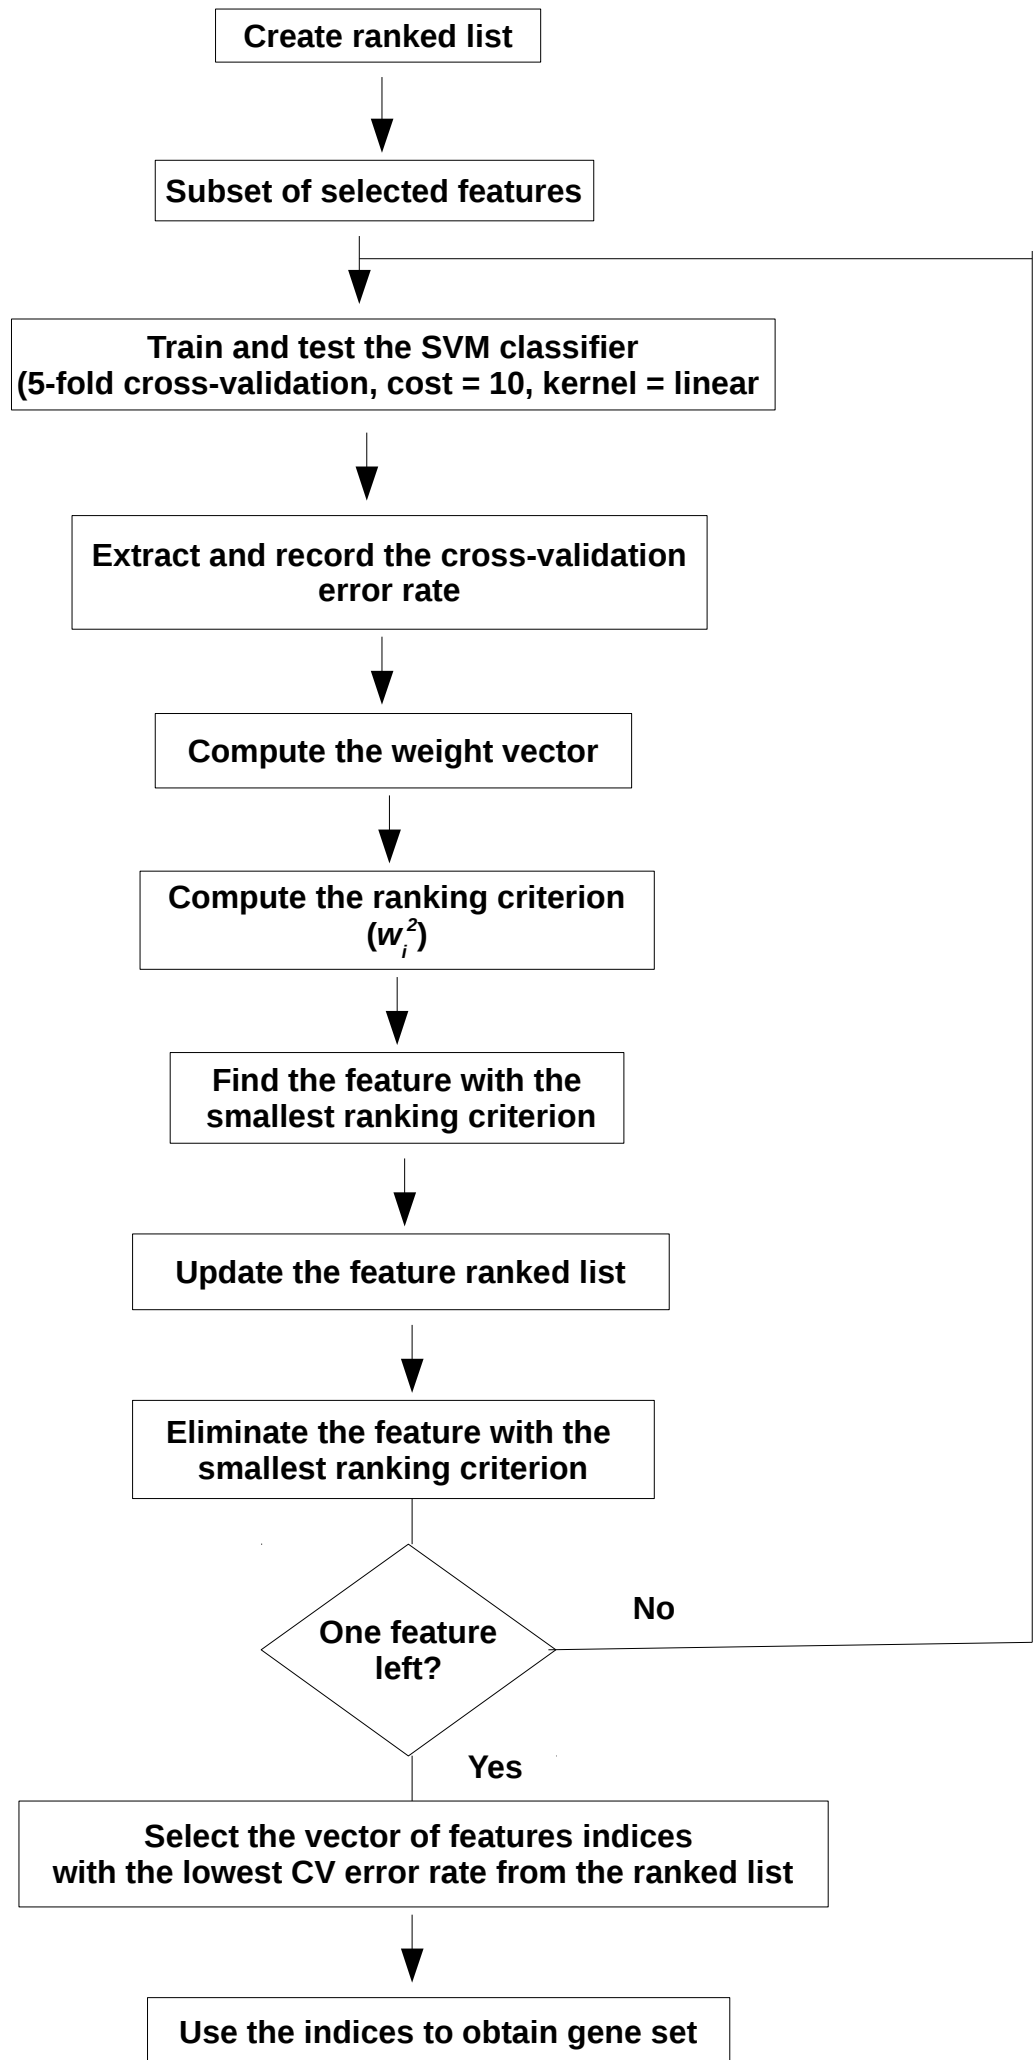

Supplement: 12885_2018_4103_MOESM2_ESM.pdf [file 12885_2018_4103_MOESM2_ESM.pdf]
